# Supplementary material
Source: Springer Nature journal article supplement (https://www.springermedizin.de/resource/supplementary/12936_2013_2745_MOESM1_ESM.pdf/9544176)
Supplement: MOESM1 [file 9544176]

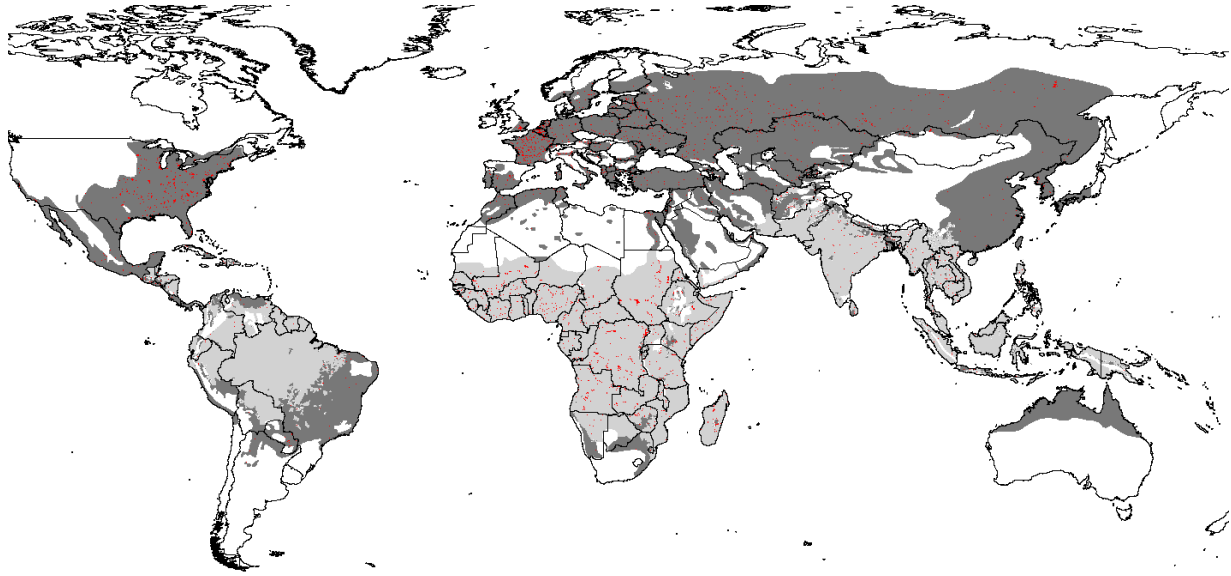

(a)

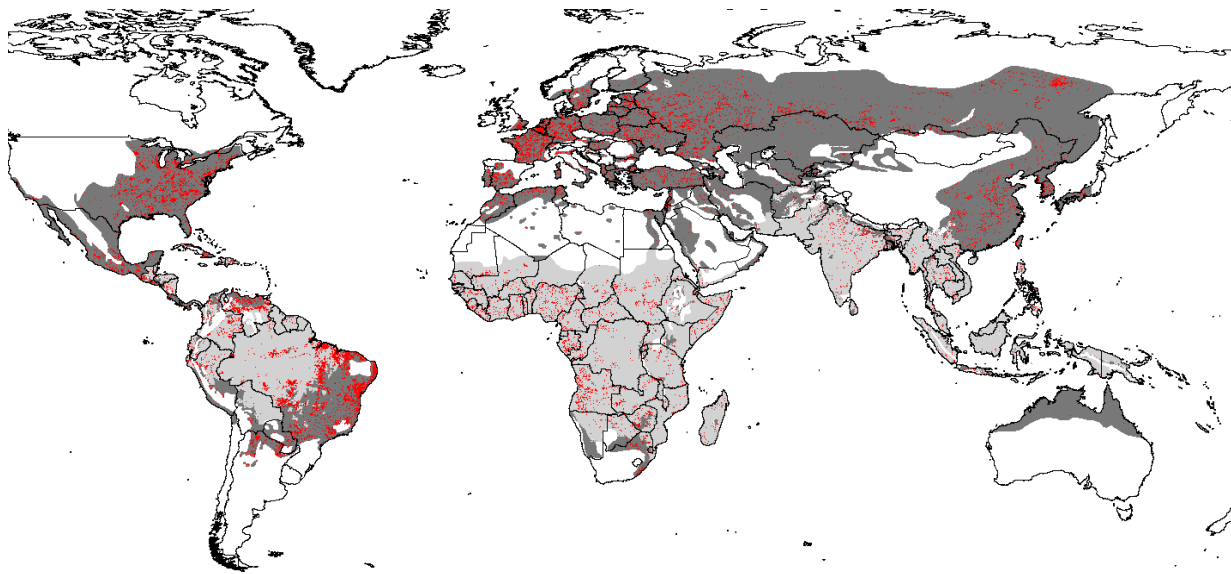

(b)

*Urban extents mapped in red for (a) 1900, and (b) 2000. These are shown on top of areas where malaria was eliminated between 1900 and 2007 (dark grey) and areas where transmission continues today (light grey).*
